# Supplementary material for: CXADR‐like membrane protein protects against heart injury by preventing excessive pyroptosis after myocardial infarction
Source: PubMed Central journal article supplement (PMC7753842; doi:10.1111/jcmm.15955), 2020-10-21
Supplement: JCMM-24-13775-s001.pdf [file JCMM-24-13775-s001.pdf]

1  
2 **SUPPLEMENTAL INFORMATION**

3  
4 **CXADR-like membrane protein protects against heart injury by preventing excessive pyroptosis**  
5 **after myocardial infarction**

6  
7 Xinglong Han<sup>1,#</sup>, Zhen-Ao Zhao<sup>2,3,#</sup>, Shiping Yan<sup>1,#</sup>, Wei Lei<sup>1,#</sup>, Hongchun Wu<sup>1</sup>, Xing-Ai Lu<sup>1</sup>, Yueqiu  
8 Chen<sup>1</sup>, Jingjing Li<sup>1</sup>, Miao Yu<sup>1</sup>, Yongming Wang<sup>4</sup>, Yufang Zheng<sup>5,6</sup>, Hongyan Wang<sup>5,7,8</sup>, Zhenya Shen<sup>1\*</sup>,  
9 Shijun Hu<sup>1,\*</sup>

10  
11 <sup>1</sup>Department of Cardiovascular Surgery of the First Affiliated Hospital & Institute for Cardiovascular  
12 Science, State Key Laboratory of Radiation Medicine and Protection, Medical College, Soochow University,  
13 Suzhou 215000, China; <sup>2</sup>Institute of Microcirculation & Department of Pathophysiology of Basic Medical  
14 College, Hebei North University, Zhangjiakou 075000, Hebei, China; <sup>3</sup>Hebei Key Laboratory of Critical  
15 Disease Mechanism and Intervention, Zhangjiakou 075000, Hebei, China; <sup>4</sup>MOE Key Laboratory of  
16 Contemporary Anthropology at School of Life Sciences and Zhongshan Hospital, Fudan University,  
17 Shanghai 200438, China; <sup>5</sup>Obstetrics and Gynecology Hospital, State Key Laboratory of Genetic  
18 Engineering at School of Life Sciences, Institute of Reproduction and Development, Fudan University,  
19 Shanghai 200011, China; <sup>6</sup>Institute of Developmental Biology & Molecular Medicine, Fudan University,  
20 Shanghai 200433, China; <sup>7</sup>Key Laboratory of Reproduction Regulation of NPFPC, Collaborative  
21 Innovation Center of Genetics and Development, Fudan University, Shanghai 200032, China; <sup>8</sup>Children's  
22 Hospital of Fudan University, Shanghai 201102, China.

23 # Co-first authors

24 **SUPPLEMENTAL MATERIALS AND METHODS**

25 **Cell culture.** Primary cardiac fibroblasts were isolated from adult mice. Briefly, after dissection, the hearts  
26 were detached, washed and minced in a sterile centrifuge tube. Tissues were then digested in basic medium  
27 containing 0.1% collagenase II (Sigma, Cat. No. V900892, USA) for 3-5 times until fully digested. The  
28 first digestion was discarded. Subsequent supernatants were collected and centrifuged at  $200 \times g$  for 5  
29 minutes. Cells were resuspended in DMEM (Gibco, Cat. No. C11995500CP, USA) supplemented with 10%  
30 fetal bovine serum (Bio-Ind, Cat. No. 04-001-1A, ISR), 100 U/ mL penicillin and 100 mg/ mL streptomycin.  
31 The cell suspension was seeded in a culture dish for fibroblast attachment. After a 2-hour culture, the non-  
32 adherent myocytes were removed by medium changing [1]. Adult mouse cardiomyocytes (CMs) were  
33 isolated via the Langendorff perfusion/collagenase-digestion procedure as previously described [2]. Briefly,  
34 adult mouse hearts were detached, and the coronary arteries were perfused via the aorta at 4 mL/min (37°C)  
35 for 5 minutes with a modified Isolation Krebs-Henseleit (MIKH) solution with pH 7.4. The detached hearts  
36 were perfused with 0.1% type II collagenase dissolved in MIKH solution [3]. After 15 minutes perfusion,  
37 the left ventricular free wall was then cut into strips and mixed to yield a single-cell suspension in MIKH  
38 solution containing 0.7% BSA (Sigma, Cat. No. V900933, USA). The  $Ca^{2+}$  concentration in the solution  
39 was increased in this suspension via stepwise increments until 1 mmol/L. The cells were then resuspended  
40 in complete medium (DMEM, 10% FBS, 100 U/ mL penicillin, 100 mg/ mL streptomycin, 1 mmol/L  $Ca^{2+}$ ,  
41 and 10 mM Norepinephrine (Sigma, Cat. No. A0937-1G, USA)), and seeded in a sterile dish. In addition,  
42 NIH3T3, H9C2 and C2C12 cells were cultured in DMEM with 10% FBS for in vitro studies and were  
43 passaged every 4-6 days using 0.25% Trypsin-EDTA. As previously described [4], HL-1 cell line was  
44 cultured in the Claycomb medium (Sigma, Cat. No. 51800C, USA) supplemented with 10% FBS, 10  $\mu$ M  
45 Norepinephrine, 100 units/ml penicillin and 100 mg/ml streptomycin. The C2C12 cells were purchased  
46 from Chinese Academy of Sciences Institute of Life Sciences Cell Resource Center (Shanghai, China). The  
47 commercial Myco-Blue Mycoplasma Detector (Vazyme, Cat. No. D101, China) was used for mycoplasma  
48 test regularly.

49 **Quantitative real-time PCR analysis (qRT-PCR).** Total RNAs were extracted using Invitrogen™

50 TRIzol<sup>TM</sup> reagent (Thermo Fisher, Cat. No. 15596018, USA). After DNase I digestion, RNAs were reverse  
51 transcribed with a TaKaRa PrimeScript<sup>TM</sup> RT Reagent Kit (Clontech, Cat. No. rr037b, USA). RNA  
52 expression was detected and analyzed using the Applied Biosystems StepOnePlus<sup>TM</sup> Real-Time PCR  
53 System (Thermo Fisher, USA). The primers used in this study are listed in **Supplementary Table 1**.

54 **Western blot.** Left ventricle (LV) cardiac tissues or cells were lysed in RIPA lysis buffer with protease and  
55 phosphatase cocktail inhibitors. The protein concentration was determined using a Pierce<sup>TM</sup> BCA Protein  
56 Assay Kit (Thermo Fisher, Cat. No. 23227, USA), and a total of 15 µg protein was loaded for each sample.  
57 The proteins were separated using 10% SDS-PAGE gels at 100 V for ~1.5 hours. Proteins were transferred  
58 to a 0.45 µm PVDF membrane (Millipore, IPVH00010) in ice-cold transfer buffer at 200 mA for 1.5-2  
59 hours. After blocked in 5% skimmed milk (dissolved in TBS-0.1% Tween 20), the membrane was incubated  
60 with appropriate primary antibodies: anti-CLMP (1:1000), anti-GSDMD (1:1000), anti-RIP3 (1:1000), anti-  
61 CaMKII (1:2000), anti-caspase-1 (1:1000), anti-PARP (1:1000), anti-IL-1β (1:1000), anti-p62 (1:1000),  
62 anti-p-histone H3 (1:1000), anti-total histone H3 (1:1000), anti-NLRP3 (1:1000) and anti-GAPDH (1:1000)  
63 respectively. After three washes in TBS-T buffer, the membranes were incubated with 1:3000 (HRP)-  
64 conjugated secondary antibodies for 1 hour at room temperature. Protein detection was performed using  
65 chemiluminescent substrates (Merck Millipore, Cat. No. WBKLS0500, Germany). All the western blot  
66 tests were repeated for 3 times. Quantification was performed by ImageJ software. The antibodies used in  
67 this study are listed in **Supplementary Table 2**.

68 **Immunofluorescence.** Mouse hearts were embedded in OCT compound (Sakura, Cat. No. k4583, USA)  
69 and frozen in liquid nitrogen. Tissue sections or cell slides were permeabilized with 0.5% Triton X-100 in  
70 PBS for 5 minutes at room temperature followed by incubation with 5% BSA in PBST (PBS containing  
71 0.1% Tween 20) for 30 minutes. Tissue sections or cell slides were incubated with primary antibodies in a  
72 humidified atmosphere for 2 hours at room temperature or overnight at 4°C. After washing 3 times for 15  
73 minutes with PBST, the sections were incubated with fluorescent secondary antibodies for 1 hour in a humid  
74 chamber, followed by nuclear staining with Hoechst 33342. The sections or slides were covered with cover

75 slips using fluorescent mounting medium. Images were obtained at 25°C using the LSM 880 Confocal  
76 Laser Scanning Microscope (Zeiss, Germany).

77 **Masson's trichrome staining.** The hearts from 5 mice of each group were collected randomly at week 4  
78 after MI. Six sections with 7- $\mu$ m thickness were made at 540- $\mu$ m intervals and collected for fibrosis staining  
79 with Masson's trichrome following the kit (Sigma, Cat. No. ht15-1kt, USA). Briefly, the slides were  
80 immersed in preheated Bouin's Solution at 56°C for 15 minutes, rinsed with deionized water to remove  
81 yellow color from sections. And then, the slides were placed sequentially in weigert's iron hematoxylin  
82 solution, biebrich scarlet-acid fuchsin, phosphotungstic/phosphomolybdic acid solution and aniline blue  
83 solution for 5 minutes each time. Finally, the sections were washed by deionized water, dehydrated through  
84 graded ethanol, cleared in xylene and mounted. To quantify fibrosis, the stained area was measured and  
85 normalized to the total area of the left ventricle at the sixth transversal level using ImageJ software.

86 **RNA sequencing (RNA-Seq).** The ischemic myocardium of the left ventricle was obtained at week 2 post-  
87 MI. Total RNAs were extracted with Invitrogen™ TRIzol™ reagent (Thermo Fisher, Cat. No. 15596018,  
88 USA). RNA-Seq library preparation and deep sequencing were performed by Genewiz (China). Transcript-  
89 level expression analysis of RNA-Seq was operated with Hierarchical Indexing for Spliced Alignment of  
90 Transcripts (Hisat2, USA) in Novogene (China).

91

92 SUPPLEMENTAL FIGURES

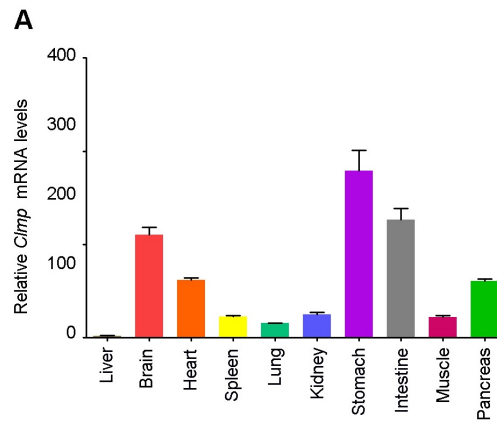

93

94

95 **Supplemental Figure 1. Comparison of *Clmp* mRNA levels in different adult tissues in mice.**

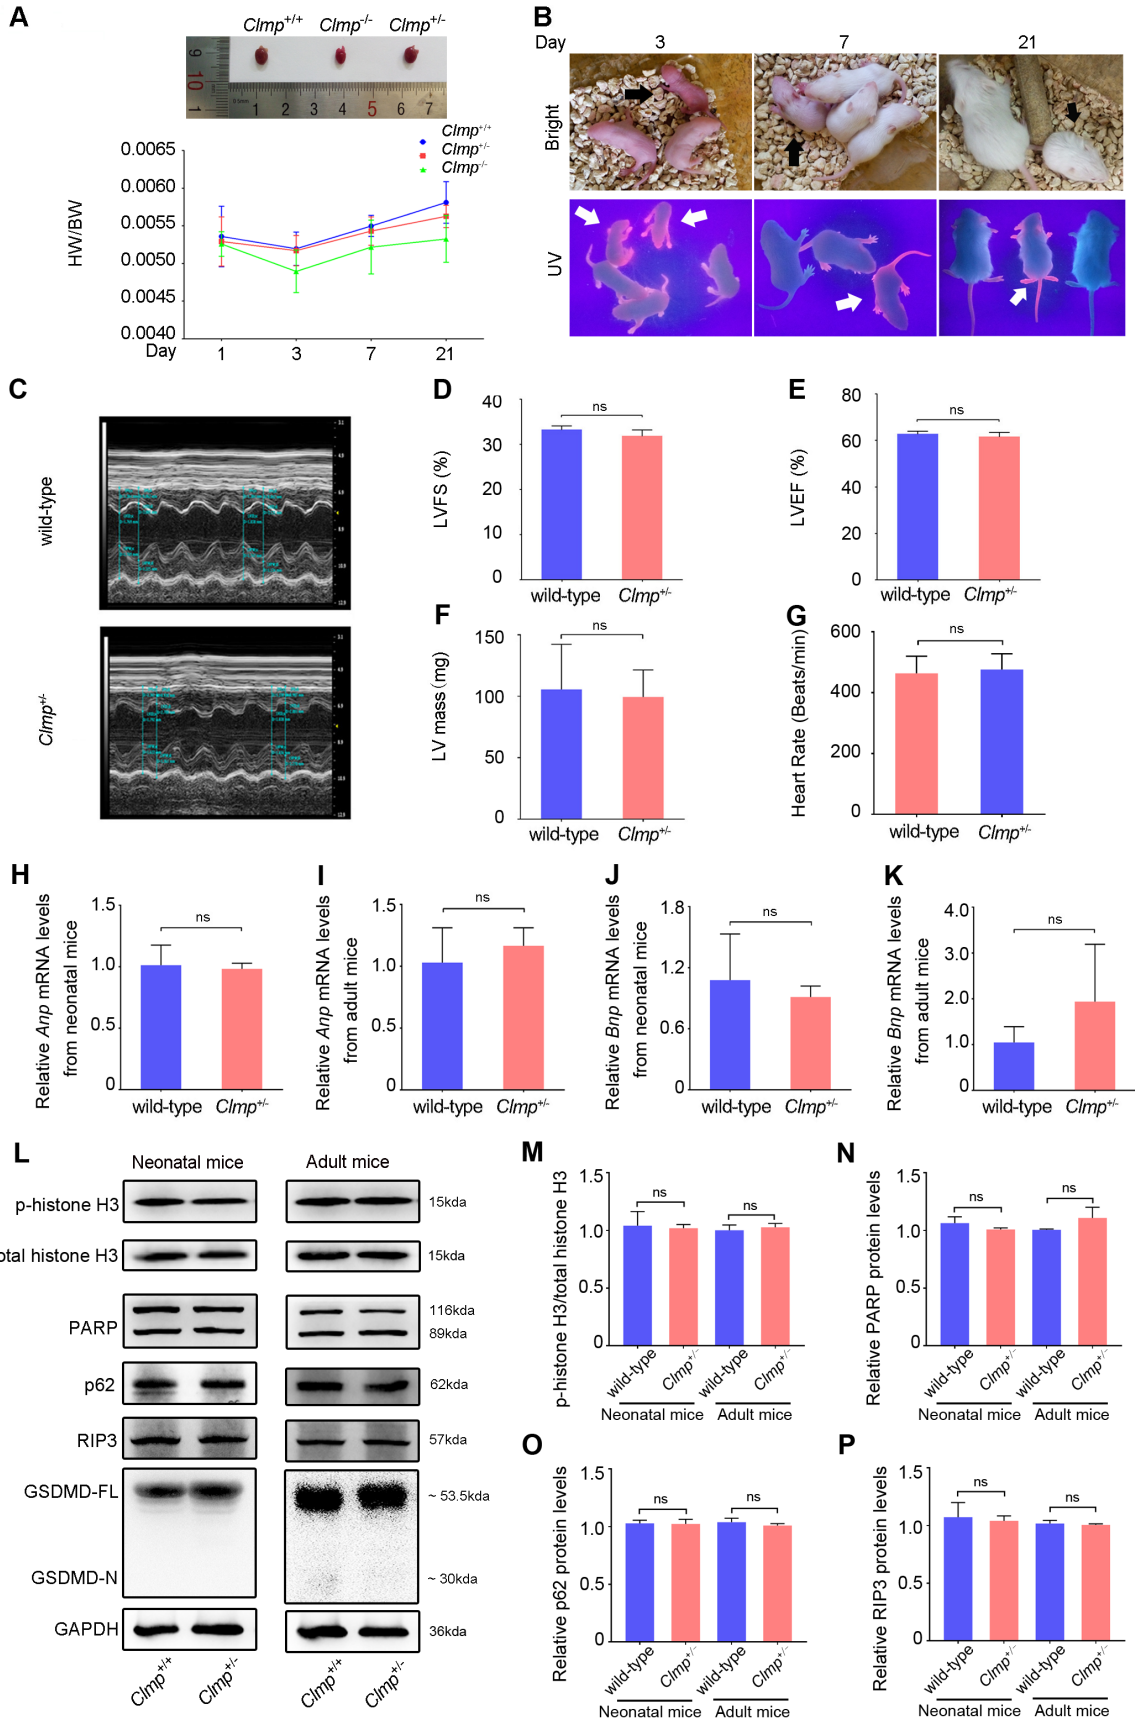

97 **Supplemental Figure 2. *Clmp* knockdown does not affect cardiac function of the adult mice. (A)**  
98 **Assessment of the heart-to-body weight ratio. HW: heart weight, BW: body weight. (B)** The homozygous  
99 mutant offspring (White arrow and black arrow) showed growth retardation during postnatal development.  
100 **(C)** The representative M-mode echocardiographic images of the wild-type and *Clmp*<sup>+/-</sup> mice. **(D)** The  
101 quantification of the left ventricle fractional shortening (LVFS) between the wild-type and *Clmp*<sup>+/-</sup> mice.  
102 **(E)** The quantification of the left ventricle ejection fraction (LVEF) between the wild-type and *Clmp*<sup>+/-</sup> mice.  
103 **(F)** The quantification of the left ventricle mass between the wild-type and *Clmp*<sup>+/-</sup> mice. **(G)** The heart  
104 rates of the wild-type and *Clmp*<sup>+/-</sup> mice. **(H-K)** ANP and BNP mRNA levels in neonatal and adult mice  
105 between the wild-type and *Clmp*<sup>+/-</sup> mice. **(L)** PARP, p62, RIP3, GSDMD and p-histone H3 protein levels  
106 between the wild-type and *Clmp*<sup>+/-</sup> mice. **(M-P)** The quantification of p-histone H3/total histone H3, PARP,  
107 p62 and RIP3 in the wild-type and *Clmp*<sup>+/-</sup> hearts.

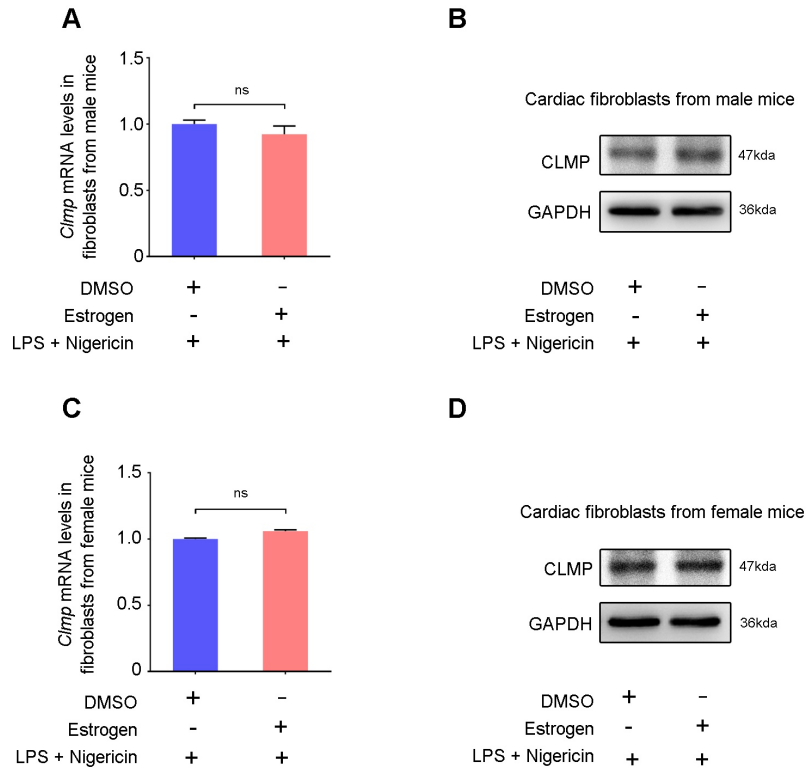

108

109

110

111

112

113

**Supplemental Figure 3. CLMP expression was not affected by treating with estrogen in primary fibroblasts from male and female mice. (A & B) The mRNA and protein levels of CLMP from male primary fibroblasts in the estrogen treatment and normal group. (C & D) The mRNA and protein levels of CLMP from female primary fibroblasts in the estrogen treatment and normal group.**



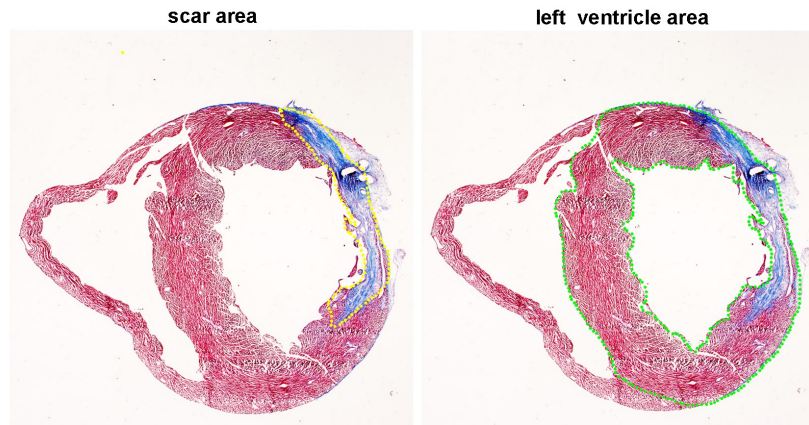

114

115

116 **Supplemental Figure 4. Method for quantification of scar area as percentage of the transversal**  
117 **ventricle area.**

118 The quantitative analysis of the left ventricular (LV) scar area by Masson's trichrome staining at week 4  
119 after myocardial infarction. The scar area was labelled with the yellow dotted line in the left panel and the  
120 LV area was labelled with the green dotted line in the right panel. The percentage of LV scar area (%) = LV  
121 scar area (yellow) / LV area (green).

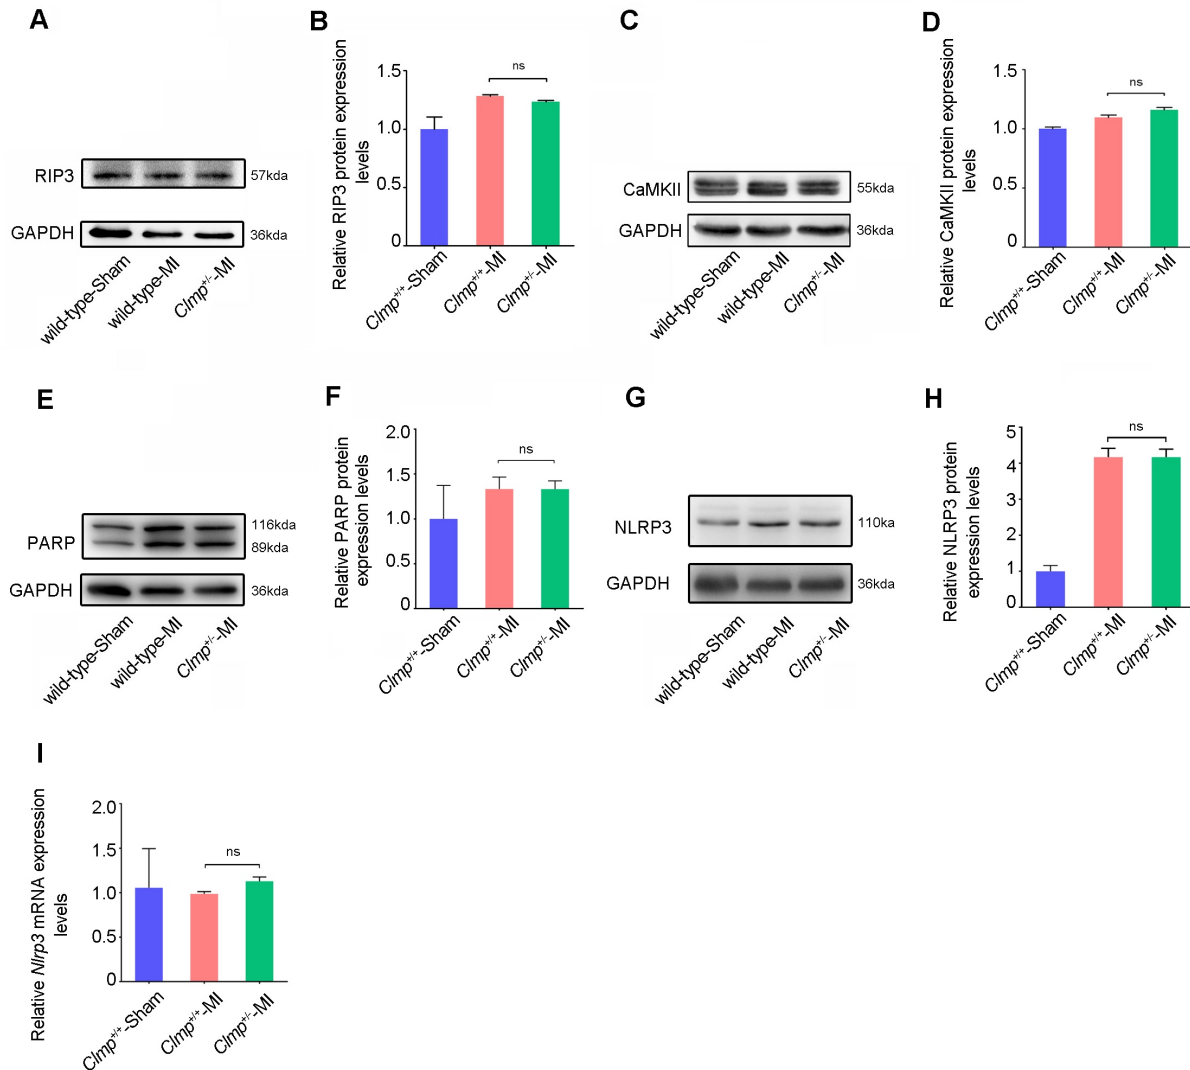

122

123 **Supplemental Figure 5. Western blot analysis of cell necrosis markers in left ventricles of the wild-**

124 **type shame, wild-type MI and *Clmp*<sup>+/-</sup> MI mice. (A) The presentative imaging of RIP3 protein expression**

125 **in mouse LVs on day 3 post-MI. (B) The relative densitometric quantification of RIP3 protein on day 3**

126 **post-MI in panel A. (C) The presentative imaging of CaMKII protein expression in mouse LVs on day 3**

127 **post-MI. (D) The relative densitometric quantification of CaMKII protein on day 3 post-MI in panel C. (E)**

128 **The presentative imaging of PARP protein expression in mouse LVs on day 3 post-MI. (F) The relative**

129 **densitometric quantification of PARP protein on day 3 post-MI in panel E. (G) The presentative imaging**

130 **of NLRP3 protein expression in mouse LVs on day 3 post-MI. (H) The relative densitometric quantification**

131 **of NLRP3 protein on day 3 post-MI in panel H. (I) The relative mRNA expression of NLRP3 on day 3**

132 **post-MI.**

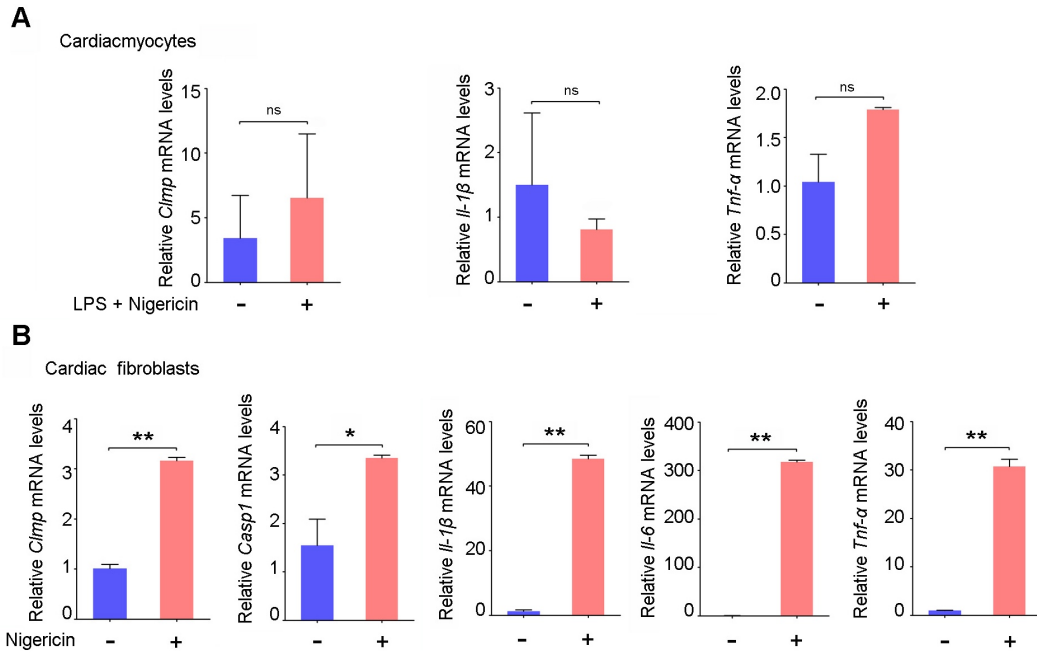

133

134 **Supplemental Figure 6. Pyroptotic and inflammatory induction in cardiomyocytes and cardiac**  
 135 **fibroblasts by LPS plus nigericin treatment.** The qRT-PCR detection of *Clmp*, the pyroptosis-related  
 136 gene *Casp1*, and inflammatory genes in cardiac myocytes (A) and cardiac fibroblasts (B), respectively.

137 \* $p < 0.05$ ; \*\* $p < 0.01$ ; ns, not significant.

138

## Supplemental Table 1. Primer sequences for quantitative PCR

139

140

141

| Gene name                      | Primers                                              |
|--------------------------------|------------------------------------------------------|
| <i>Clmp</i>                    | F-GGAGAAGATGAACACCTGCC<br>R-ACAGTCACCCGTACCACACA     |
| <i>C4b</i>                     | F-GTGGTTCCTGCTCCCCAAAG<br>R-CCACAGCTCCTCACATCTTCC    |
| <i>Ighm</i>                    | F-CAGATCCGGTGACCATCGAG<br>R-AGAAGGTGAGACCCCTGTGA     |
| <i>Igkc</i>                    | F-CTTCCCACCATCCAGTGAGC<br>R-AGTCCAAGTGTTCAGGACGC     |
| <i>Ighg1</i>                   | F-AACAGCACTTTCCGCTCAGT<br>R-AAAGCTGCACTGTTGACCCT     |
| <i>Ccl8</i>                    | F-GCTGTGGTTTTCCAGACCAA<br>R-GAAGGTTCAAGGCTGCAGAA     |
| <i>IL-1<math>\beta</math></i>  | F-TTGAAGTTGACGGACCCCAA<br>R-GCTCTTGTTGATGTGCTGCT     |
| <i>IL-6</i>                    | F-TCTTCAACCAAGAGATAAGCTGGA<br>R-CGCACTAGGTTTGCCGAGTA |
| <i>Tnf-<math>\alpha</math></i> | F-CGGGCAGGTCTACTTTGGAG<br>R-ACCCTGAGCCATAATCCCCT     |
| <i>J chain</i>                 | F-AGGATCATCCCTTCCACCGA<br>R-CCACTTCCACAGGATCGCAT     |
| <i>Gsdmd</i>                   | F-CGCAGCCCCTATCTTCTACC<br>R-GACGTGCTTCACCAACTCCA     |
| <i>Casp1</i>                   | F-GCCCTGTTGGAAAGGAACTAAC<br>R-AAATTGCTTCCTCTTTGCCCTC |
| <i>Ly6G</i>                    | F-AGAGGAAGTTTTATCTGTGCAGCC<br>R-TCAGGTGGGACCCCAATACA |
| <i>Nlrp3</i>                   | F-ATCAACAGGCGAGACCTCTG<br>R-GTCCTCCTGGCATAACCATAGA   |
| <i>Anp</i>                     | F-GATTGGAGCCCAGAGTGGAC<br>R-CAGTGGCAATGTGACCAAGC     |
| <i>Bnp</i>                     | F-CGGATCCGTCAGTCGTTTGG<br>R-CACTTCAAAGGTGGTCCCAGA    |
| <i>I8s</i>                     | F-CTTAGAGGGACAAGTGGCG<br>R-ACGCTGAGCCAGTCAGTGTA      |

142 **Supplemental Table 2. All the antibodies for Western blot and Immunofluorescence**

143

| <b>NAME</b>                                        | <b>CAT. NO</b> | <b>MANUFACTURER</b>    | <b>COUNTRY</b> |
|----------------------------------------------------|----------------|------------------------|----------------|
| CLMP                                               | af7356         | R&D                    | USA            |
| GSDMD                                              | sc-393656      | Santa Cruz             | USA            |
| RIP3                                               | 17563-1-ap     | Proteintech            | CHINA          |
| CaMKII                                             | pa522168       | Thermo                 | USA            |
| caspase-1                                          | pa522168       | Adipogen               | USA            |
| PARP                                               | 9532           | CST                    | USA            |
| NLRP3                                              | ab214185       | Abcam                  | USA            |
| p-histone H3                                       | sc-8656-R      | Santa Cruz             | USA            |
| histone H3                                         | ab1791         | Abcam                  | USA            |
| p62                                                | 18420-1-AP     | Proteintech            | CHINA          |
| IL-1 $\beta$                                       | ab9722         | Abcam                  | USA            |
| GAPDH                                              | dkm9002        | Sungene                | CHINA          |
| Cardiac Troponin T                                 | 15513-1-AP     | Proteintech            | CHINA          |
| HRP AffiniPure Donkey Anti-Sheep IgG               | A21060         | Abbkine                | CHINA          |
| Peroxidase AffiniPure Goat Anti-Mouse IgG          | 115-035-003    | Jackson ImmunoResearch | USA            |
| Peroxidase AffiniPure Goat Anti-Rabbit IgG         | 111-035-003    | Jackson ImmunoResearch | USA            |
| Peroxidase AffiniPure Rabbit Anti-Goat IgG         | 305-035-003    | Jackson ImmunoResearch | USA            |
| Alexa Fluor® 594 AffiniPure Donkey Anti-Mouse IgG  | 715-585-151    | Jackson ImmunoResearch | USA            |
| Alexa Fluor® 488 AffiniPure Donkey Anti-Rabbit IgG | 711-545-152    | Jackson ImmunoResearch | USA            |

144

145

146

147

148

149

150 **SUPPLEMENTAL REFERENCE**

151

152 1. **Xiang FL, Fang M, Yutzey KE.** Loss of beta-catenin in resident cardiac fibroblasts attenuates fibrosis  
153 induced by pressure overload in mice. *Nat Commun.* 2017; 8: 712.

154 2. **McCarroll CS, He W, Foote K, Bradley A, McGlynn K, Vidler F, Nixon C, Nather K, Fattah C, Riddell**  
155 **A, Bowman P, Elliott EB, Bell M, Hawksby C, MacKenzie SM, Morrison LJ, Terry A, Blyth K, Smith**  
156 **GL, McBride MW, Kubin T, Braun T, Nicklin SA, Cameron ER, Loughrey CM.** Runx1 Deficiency  
157 Protects Against Adverse Cardiac Remodeling After Myocardial Infarction. *Circulation.* 2018; 137: 57-70.

158 3. **Kotter S, Kazmierowska M, Andresen C, Bottermann K, Grandoch M, Gorressen S, Heinen A, Moll**  
159 **JM, Scheller J, Godecke A, Fischer JW, Schmitt JP, Kruger M.** Titin-Based Cardiac Myocyte Stiffening  
160 Contributes to Early Adaptive Ventricular Remodeling After Myocardial Infarction. *Circ Res.* 2016; 119:  
161 1017-29.

162 4. **W C Claycomb NALJ, B S Stallworth, D B Egeland, J B Delcarpio, A Bahinski, N J Izzo Jr.** HL-1 Cells:  
163 A Cardiac Muscle Cell Line That Contracts and Retains Phenotypic Characteristics of the Adult  
164 Cardiomyocyte. *Proc Natl Acad Sci U S A.* 1998; 95: 6.

165
